# Supplementary material for: Biomarkers for Monitoring Pre-Analytical Quality Variation of mRNA in Blood Samples
Source: PLoS One. 2014 Nov 4;9(11):e111644. doi: 10.1371/journal.pone.0111644 (PMC4219744; doi:10.1371/journal.pone.0111644)
Supplement: Table S1 — qPCR assay design information for all biomarkers. (XLSX) [file pone.0111644.s007.xlsx]

## Sheet: Primers
Gene symbol	Gene description	refseq	Type of assay	Amplicon length	Forward primer sequence	Reverse primer sequence	Probe sequence	Efficiency (%)	Error	Slope	NTC (Cq)
GAPDH	glyceraldehyde-3-phosphate dehydrogenase	NM_002046.3	5´	134	GCAGCCTCCCGCTTC	CAATACGACCAAATCCGTTGA	TCCTCCTGTTCGACAGTCAGCCGCATC	0.959098	0.0279	-3.424	xxx32
			3´ short	91	CCTCCACCTTTGACGCT	TTGCTGTAGCCAAATTCGTT	AGCTTGACAAAGTGGTCGTTGAGGGCAATG	0.971961	0.0225	-3.391	xxx32
			3´ medium	252	CAACGTGTCAGTGGTGGA	TTGCTGTAGCCAAATTCGTT	AGCTTGACAAAGTGGTCGTTGAGGGCAATG	1.02827	0.0291	-3.256	xxxx
			3´ long	535	TCAAGATCATCAGCAATGCC	TTGCTGTAGCCAAATTCGTT	AGCTTGACAAAGTGGTCGTTGAGGGCAATG	0.968419	0.116	-3.4	xxxx
PPIB	peptidyl-prolyl cis-trans isomerase B precursor	NM_000942.4	5´	119	GCCCAAAGTCACCGTC	AGGCCACAAAATTATCCACTG	CCGGCCTACATCTTCATCTCCAATTCGT	0.928887	0.0107	-3.505	xxxx
			3´ short	92	GGCAAAGTTCTAGAGGGCA	GCGATGATCACATCCTTCAG	CTCTCCACCTTCCGCACCACCTCC	0.943943	0.0101	-3.464	xxx41
			3´ medium	273	GGGAGATGGCACAGGAG	GCGATGATCACATCCTTCAG	CTCTCCACCTTCCGCACCACCTCC	0.91324	0.0592	-3.549	xxx41
			3´ long	476	GTCACCGTCAAGGTGTATTT	GCGATGATCACATCCTTCAG	CTCTCCACCTTCCGCACCACCTCC	0.925285	0.0384	-3.515	xxxx
HIGD1A	HIG1 hypoxia inducible domain family, member 1A	NM_014056.3	5´ short	142	CGGGTTTTGCAGCAATTGT	GAATAGCCCATACCAACAGTC	CCTTGGGCTGCCACACGCATGTG	0.942454	0.0212	-3.468	xxxx
			5´ medium	366	ATTGGCTGGGACGGC	GAATAGCCCATACCAACAGTC	CCTTGGGCTGCCACACGCATGTG	0.878225	0.102	-3.653	33xx33
			3´	103	CACTCTTCTATTTATTTTCAGTCACC	TCGACCAGAACTGGTTAGTAG	AAGCCTAGCATATTTCTTCCTTCCCTCCTCC	0.911495	0.0365	-3.554	xxxx
SF3A1	splicing factor 3A subunit 1 isoform 2	NM_001005409.1	5´	184	CCACGGAGCCCAAACAG	TTGATCTCGTTCTGTCGGAT	CCACAACTGGCTTAGAAGGTGCAGAATCCTCC	1.00754	0.0973	-3.304	xxxx
			3´ short	116	CTCACGGACCAGGTCTC	GCCAGTGAGTTGGAATCTTTG	ACCCTCATACTGTAGCTTCTGTTTCCCTGCA	0.935439	0.00836	-3.487	xxxx
			3´ medium	356	GTGCCTGCTCCACCTG	GCCAGTGAGTTGGAATCTTTG	ACCCTCATACTGTAGCTTCTGTTTCCCTGCA	0.963737	0.05	-3.412	xxxx
STK10	serine/threonine kinase 10	NM_005990.3	5´	119	CCTTCGGCAAGGTTTACAAG	CAGGATCTCAATCTCCACGA	TAGTCCTCCAGCTCCTCCTCACTCTTGGTT	0.934706	0.0104	-3.489	xxxx
			3´ short	139	CAGAATGAAAAGTGCCACCT	GGTTCAGATCCTCTTCCAGA	TTCCTTCAGGTTCTGGTTATGGCTCTCATCCA	0.894726	0.0975	-3.603	xxxx
			3´ medium	274	AAGATCAAGCAGTTCTCCCA	GGTTCAGATCCTCTTCCAGA	TTCCTTCAGGTTCTGGTTATGGCTCTCATCCA	0.861058	0.0956	-3.707	xxxx
			3´ long	470	GCTGCGCAAGCATGAGA	GGTTCAGATCCTCTTCCAGA	TTCCTTCAGGTTCTGGTTATGGCTCTCATCCA	0.867656	0.0269	-3.686	xxxx
TMEM41B	transmembrane protein 41B	NM_015012.2	5´ short	122	CGAACGATCGCAGTTGG	CAGCTTCTACCCAGGATTT	TCCTTCTGGTGGTCTCTGCTGCC	0.848152	0.0785	-3.749	xxxx
			5´ medium	218	TAGTAAGGAGCCTGCAACAG	CAGCTTCTACCCAGGATTT	TCCTTCTGGTGGTCTCTGCTGCC	0.832689	0.0335	-3.801	xxxx
			5´ long	407	CAGGACCCTGACTTGTCTC	CAGCTTCTACCCAGGATTT	TCCTTCTGGTGGTCTCTGCTGCC	0.885083	0.0848	-3.632	xxxx
			3´	122	TGAGAATAACACCATTTCTGCC	GGCTACAAAAGAAGGAGGTG	ACATCTCCTGTGATAAACGTGCCATTGAAAGT	0.986381	0.079	-3.355	xxxx
FAM126B	family with sequence similarity 126, member B	NM_173822.3	5´ short	112	AACATTCACTGCACAGAACC	ACCCATCCGACAAAGAGATT	AACACAGCATGAGAAAACTCAGGACTTCAAAC	0.89238	0.0976	-3.61	xxx34
			5´ medium	355	TACAGTTAGCCGAGACAGAC	ACCCATCCGACAAAGAGATT	AACACAGCATGAGAAAACTCAGGACTTCAAAC	0.992102	0.0482	-3.341	xxx37
			5´ long	543	TATGCAGCAACTTTACACCG	ACCCATCCGACAAAGAGATT	AACACAGCATGAGAAAACTCAGGACTTCAAAC	1.01694	0.0457	-3.282	xxxx
			3´	148	GCAGGGAGTAGTTGAAAAGT	TCTCTCAATTCAGTATGGATGA	CCCAAACCCAAACCTGTATCAGTGATTGTT	1.04482	0.0956	-3.219	xxxx
QKI	quaking homolog, KH domain RNA binding	NM_006775.2	5´ short	125	GGGAGAATCCTTGGACCTAG	TTGCCTCTATTTTGCTCCTC	CCTCATTGAGCCTTTGCCTCGGACCAT	0.876607	0.0943	-3.658	xxxx
			5´ medium	326	AACTTCTGCGGGATCTTCAA	TTGCCTCTATTTTGCTCCTC	CCTCATTGAGCCTTTGCCTCGGACCAT	1.02959	0.0687	-3.253	xxxx
			5´ long	428	TGGAATATGGTCGGGGAAAT	TTGCCTCTATTTTGCTCCTC	CCTCATTGAGCCTTTGCCTCGGACCAT	1.02959	0.0687	-3.253	xxxx
			3´	92	TCATCTCCAAGTACCTCTGG	GCAACTGTGGGCTACTTTAA	TCCTCTTGCTCACCGGAACCTTAGTT	0.89439	0.11	-3.604	xxxx
USP32	ubiquitin specific peptidase 32	NM_032582.3	5´	126	GATGCTTTCAAGAGGACCTG	TGTTCCACCAAAAGAACAGT	CTCATATTACATGGGCCAGCACTGCTTCATCC	0.966854	0.0344	-3.404	xxxx
			c short	122	CCACAGCTGATTCATGGAAG	TCTGTCTTGCTGTTCTTGAT	TTTGCTCCATACCAGTGATAAAGTGCTCTCCA	0.97952	0.0432	-3.372	xxxx
			c medium	341	GGCTTTCTGTATTCTGCCAC	TCTGTCTTGCTGTTCTTGAT	TTTGCTCCATACCAGTGATAAAGTGCTCTCCA	0.94357	0.101	-3.465	xxxx
			c long	543	TGTCAAATACGATGCCAACC	TCTGTCTTGCTGTTCTTGAT	TTTGCTCCATACCAGTGATAAAGTGCTCTCCA	0.983545	0.0296	-3.362	xxxx
			3´	126	AATTTCGTGCCATTCAGGAA	GTGTCAATTTCATCCGGGTG	AGCTGCTGTCATTGTAACAGTACCACTTGCA	0.95336	0.043	-3.439	xxxx
GUSB	glucuronidase, beta	NM_000181.3	5´	85	CGACTTCTCTGACAACCGA	CATGTCCACGGTGGGG	CCGCCGGTACCACTGCTCCTCGAA	0.903206	0.0295	-3.578	xxxx
			3´ short	87	AGAAACGATTGCAGGGTTTC	CCCAGATGGTACTGCTCTAG	ACTTTTCTGGTACTCTTCAGTGAACATCAGAG	0.956029	0.0175	-3.432	xxxx
			3´ medium	283	CTGTGACCTTTGTGAGCAAC	CCCAGATGGTACTGCTCTAG	ACTTTTCTGGTACTCTTCAGTGAACATCAGAG	0.924568	0.046	-3.517	xxxx
			3´ long	520	ATGGGATTGTGGTCATCGAT	CCCAGATGGTACTGCTCTAG	ACTTTTCTGGTACTCTTCAGTGAACATCAGAG	0.991691	0.0068	-3.342	xxxx
LMNA	lamin A/C	NM_005572.3	3´ short	92	ACCTGGTGTGGAAGGC	GCGCATGGCCACTTC	TGTTCCCGCAGCCCCAGGTGTTC	0.947688	0.0188	-3.454	41xx40
			3´ medium	289	GGATGAGGAGGGCAAGTT	GCGCATGGCCACTTC	TGTTCCCGCAGCCCCAGGTGTTC	0.954121	0.0412	-3.437	xxxx
			3´ long	505	CCACGCCTACCGCAAG	GCGCATGGCCACTTC	TGTTCCCGCAGCCCCAGGTGTTC	0.89238	0.0771	-3.61	xxxx
RND1	Rho family GTPase 1	NM_014470.3	3´ short	86	CGAACAGACCTGAGTACTCT	TGCTTTGCTATTGCACAACC	CCTGCTTCTGGTGGGACAGCTCCA	0.976722	0.0146	-3.379	xxxx
			3´ medium	288	GCTTAGTCTCTGGGATACCT	TGCTTTGCTATTGCACAACC	CCTGCTTCTGGTGGGACAGCTCCA	0.99997	0.0859	-3.322	xxxx
			3´ long	437	CAGATGTAAGCTCGTTCTGG	TGCTTTGCTATTGCACAACC	CCTGCTTCTGGTGGGACAGCTCCA	0.928525	0.105	-3.506	xxx42
TNF	tumor necrosis factor	NM_000594.2	3´ short	92	CTCTCTAATCAGCCCTCTGG	CTTGAGGGTTTGCTACAACAT	CCAGGCAGTCAGATCATCTTCTCGAACCC	0.94357	0.0227	-3.465	xxxx
			3´ medium	293	CATGAGCACTGAAAGCATGA	CTTGAGGGTTTGCTACAACAT	CCAGGCAGTCAGATCATCTTCTCGAACCC	1.02871	0.0573	-3.255	xxxx
			3´ long	436	CCAGCTAAGAGGGAGAGAAG	CTTGAGGGTTTGCTACAACAT	CCAGGCAGTCAGATCATCTTCTCGAACCC	0.931424	0.0267	-3.498	xxxx
FOSB	FBJ murine osteosarcoma viral oncogene homolog B	NM_006732.2	3´ short	82	TGCCGAGTCTCAATATCTGT	GAGACCGGCGCACTC	ACTCCTTCGGCAGTCCACCCACC	0.874031	0.0391	-3.666	xxxx
			3´ medium	280	GTACTTTGAGGACTCGCTCA	GAGACCGGCGCACTC	ACTCCTTCGGCAGTCCACCCACC	0.872109	0.00297	-3.672	xxxx
			3´ long	481	GAAGCTGATTCTGTACAGCG	GAGACCGGCGCACTC	ACTCCTTCGGCAGTCCACCCACC	0.840648	0.052	-3.774	xxxx
ATP2B4	ATPase, Ca++ transporting, plasma membrane 4	NM_001001396.1	3´ short	87	GTCTTTTCAGGCATCTACCG	CCCAAATTCCACGATGAAAA	TTCTGCTCTGTAGTCTTGGGCACATTCATCTG	0.966854	0.0134	-3.404	36xx40
			3´ medium	298	GATGAAGAACATCTTGGGCC	CCCAAATTCCACGATGAAAA	TTCTGCTCTGTAGTCTTGGGCACATTCATCTG	0.954883	0.0452	-3.435	xxx40
			3´ long	484	CGTGATTGTAGCCTTCACTG	CCCAAATTCCACGATGAAAA	TTCTGCTCTGTAGTCTTGGGCACATTCATCTG	0.94844	0.0319	-3.452	xxx42
TNFRSF10C	tumor necrosis factor receptor superfamily, member 10c	NM_003841.2	3´ short	87	TCAGTGTAAAGAAGGCACCT	ACTTGGACTTCCCCACTAG	CCTGCTACACTTCCGGCACATCTCTGG	1.00416	0.0139	-3.312	xxx42
			3´ medium	287	CAACAGAGGCACAGCTTC	ACTTGGACTTCCCCACTAG	CCTGCTACACTTCCGGCACATCTCTGG	0.933975	0.0883	-3.491	xxx43
			3´ long	514	GCTTCCTACCGTTAGGGA	ACTTGGACTTCCCCACTAG	CCTGCTACACTTCCGGCACATCTCTGG	0.920643	0.0212	-3.528	xxxx
TRIM13	tripartite motif-containing 13	NM_213590.1	3´ short	80	CTGCTTTGCCCTGGGAAATA	CTTCAAGCAGCTCCATCAC	CCTCTGTCTCCTACAAGCTGATGTATTTGGCA	0.944317	0.0276	-3.463	xxx40
			3´ medium	281	CCGAGAAGCTGCTTAATACAA	CTTCAAGCAGCTCCATCAC	CCTCTGTCTCCTACAAGCTGATGTATTTGGCA	0.949194	0.0454	-3.45	xxxx
			3´ long	509	CAGCGCGGCAGAAAC	CTTCAAGCAGCTCCATCAC	CCTCTGTCTCCTACAAGCTGATGTATTTGGCA	0.94171	0.0116	-3.47	xxx35
LYSMD1	LysM, putative peptidoglycan-binding, domain containing 1	NM_212551.4	3´ short	85	GCTTGATTCACAGATCAGCC	TGCATCCTCCCCAGGTA	CAGCTTCTGAGCAGCAGCCTTCTTGGAC	0.964514	0.0364	-3.41	xxxx
			3´ medium	287	TGTTCAATGGTTTGGACTCTG	TGCATCCTCCCCAGGTA	CAGCTTCTGAGCAGCAGCCTTCTTGGAC	1.05909	0.136	-3.188	xxxx
			3´ long	503	CTCGTTCATATGGAAGCCTG	TGCATCCTCCCCAGGTA	CAGCTTCTGAGCAGCAGCCTTCTTGGAC	0.973147	0.0528	-3.388	xxxx

## Sheet: Gels
Assay Name	hGAPDH_5p01	hGAPDH_S01	hGAPDH_M01	hGAPDH_L01	hPPIB_5p01	hPPIB_S01	hPPIB_M01	hPPIB_L01	hHIGD1A_5pS01	hHIGD1A_5pM01	hHIGD1A_3p01	hSF3A1_5p01		hSF3A1_S01	hSF3A1_M01	hSF3A1_L01	hSTK10_5p01	hSTK10_S01	hSTK10_M01	hSTK10_L02	hTMEM_5pS01	hTMEM_5pM01	hTMEM_5pL01	hTMEM_3p01	hFAM_5pS01		hFAM_5pM01	hFAM_5pL01	hFAM_3p01	hQKI_5pS01	hQKI_5pM01	hQKI_5pL01	hQKI_3p02	hUSP32_5p01	hUSP32_S01	hUSP32_M01	hUSP32_L01	hUSP32_3p01		hGUSB_5p	hGUSB_S01	hGUSB_M01	hGUSB_L01	hLMNA_S01	hLMNA_M01	hLMNA_L01	hRND1_5pS01	hRND1_5pM01	hRND1_5pL02
[truncated: 17 more columns]
